# Supplementary material
Source: publisher site journal article supplement (https://www.dovepress.com/get_supplementary_file.php?f=310319.docx)
Supplement: Supplementary file 1 [file get_supplementary_file.php]

# Supplementary Tables

Table A‑1: Unit costs(resource use and loss work productivity)

| **Concept,** | **Unit** | **Cost** | **Source** |
| --- | --- | --- | --- |
| Emergency visit (no admission) | €/visit | €171.85 | ESALUD**a** |
| Medical visit primary care | €/visit | €32.61 |
| Specialist medical visit | €/visit | €86.76 |
| Hospital admission | €/day | €338.58 |
| UCI Income | €/day | €650.56 |
| Spirometry | €/test | €50.81 |
| Bronchodilator test | €/test | €58.10 |
| Arterial blood gases | €/test | €43.55 |
| Chest CT | €/test | €190.27 |
| CT paranasal sinuses | €/test | €120.47 |
| Chest X-ray | €/test | €26.57 |
| FENO measurement | €/test | €100.02 |
| Bronchoscopy | €/test | €158.40 |
| Complete functional test | €/test | €154.93 |
| Blood analytical | €/test | €63.32 |
| 6-minute walk test | €/test | €59.29 |
| Home oxygen | €/session | €3.53 |
| Influenza vaccine | €/syringe | €7.97 | BOTPLUS **b** |
| Pneumococcal vaccination | €/syringe | €38.62 |
| Sputum culture | €/test | €70.28 | ESALUD**a** |
| Echocardiogram | €/test | €126.95 |
| Respiratory rehabilitation | €/session | €19.00 |
| Non-invasive home ventilation | €/session | €6.83 |
| Auto CPAP | €/study | €370.48 |
| Cycle ergometry | €/test | €103.20 |
| TEE | €/test | €151.51 |
| Transthoracic echocardiogram | €/test | €168.37 |
| Functional study | €/test | €64.13 |
| Bone scan | €/test | €220.06 |
| Thyroid scan | €/test | €53.11 |
| PET-TAC | €/test | €1,187.34 |
| Cardiopulmonary stress test | €/test | €240.13 |
| Alveolar-capillary diffusion | €/test | €513.51 |
| Thoracentesis | €/test | €79.54 |
| Urine antigens | €/test | €37.32 |
| Alpha-1 antitrypsin deficiency genetic study | €/test | €83.99 |
| RM column | €/test | €220.80 |
| Pulmonary volume | €/test | €55.27 |
| CT scan abdomen | €/test | €218.55 |
| Bone densitometry | €/test | €86.32 |
| Cranial MRI | €/test | €176.57 |
| Cranial CT | €/test | €161.70 |
| Cardiological PET | €/test | €891.21 |
| CPAP | €/session | €2.01 |
| Inspirometry | 1 unit | €10.00 |
| **Lost work productivity** | | | |
| Mean hourly salary - Both sexes | €/hour | €15.36 | INE **C** |
| **Notes:** All prices in 2019 euros. The search for unit costs was carried out in April 2019. a ESALUD (Gisbert and Brosa 2019). b Database of the General Council of Official Colleges of Pharmacists - BOTPLUS (General Council of Official Colleges of Pharmacists 2013). c INE Wage Structure Survey (National Statistical Institute [INE] 2019).  **Abbreviations:** ICU, intensive care unit; CT, computed axial tomography; FENO, exhaled nitric oxide; CPAP, continuous positive airway pressure; TEE, transoesophageal echocardiogram; PET-CT, positron emission tomography-computed axial tomography; MRI, magnetic resonance imaging; PET, positron emission tomography. | | | |
|  | | | |
|  | | | |
|  | | | |
|  | | | |
